# Supplementary material for: Facile synthesis of luminescent and amorphous La2O3–ZrO2:Eu3+ nanofibrous membranes with robust softness
Source: Royal Society of Chemistry journal article supplement (doi:10.1039/c5nr02173a), 2015-01-01
Supplement: c5nr02173a1.pdf [file c5nr02173a1.pdf]

**Electronic Supplementary Information**

**Facile synthesis of luminescent and amorphous  $\text{La}_2\text{O}_3\text{-ZrO}_2\text{:Eu}^{3+}$   
nanofibrous membranes with robust softness**

Weidong Han<sup>a</sup>, Bin Ding<sup>\*c</sup>, Mira Park<sup>b</sup>, Fuhai Cui<sup>a</sup>, Zafar Khan Ghouri<sup>a</sup>, Prem Singh  
Saud<sup>a</sup>, Hak-Yong Kim<sup>\*a</sup>

<sup>a</sup>*Departement of BIN Fusion Technology, Chonbuk National University, Jeonju 561-756, Republic of Korea*

<sup>b</sup>*Department of Organic Materials and Fiber Engineering, Chonbuk National University, Jeonju 561-756,*

*Republic of Korea*

<sup>c</sup>*Key Laboratory of Textile Science & Technology, Ministry of Education, College of Textiles, Donghua University,*

*Shanghai 201620, China*

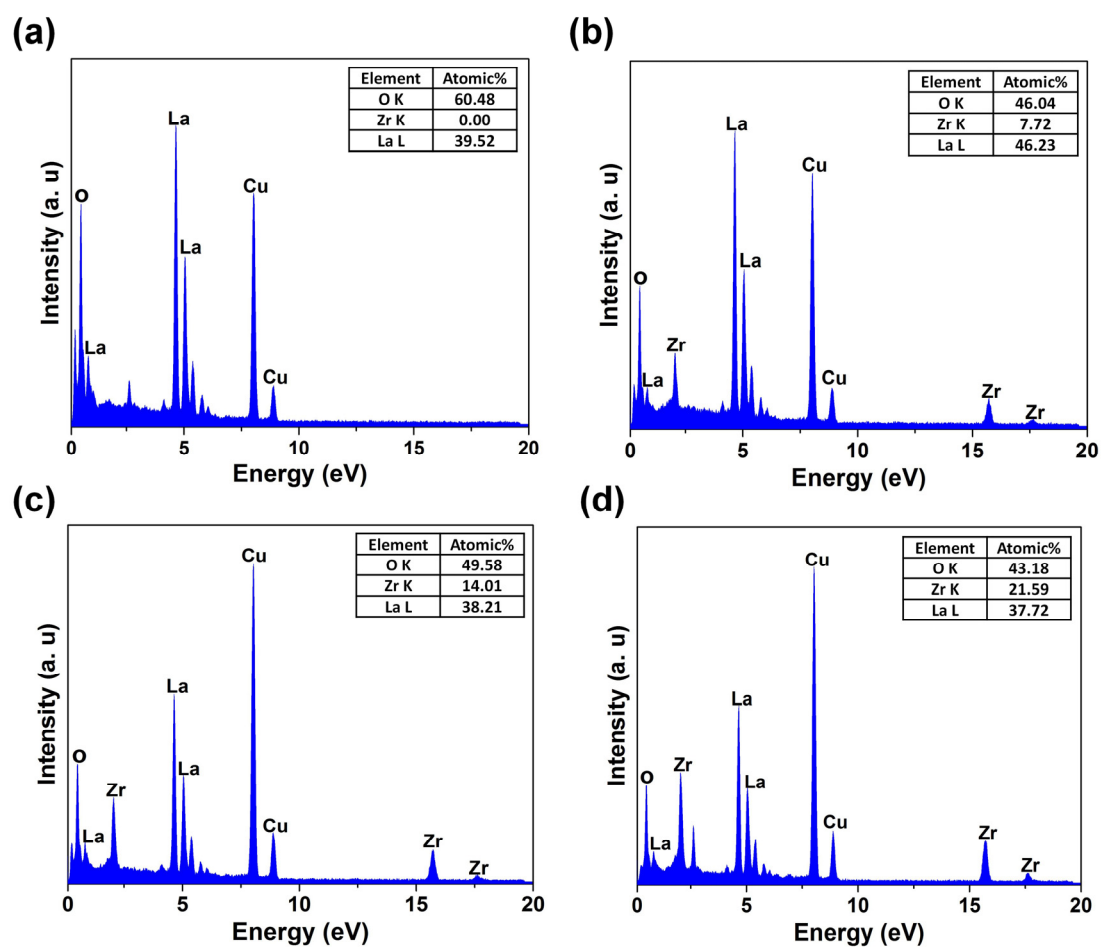

**Fig. S1** EDS spectrums of LZ-0, LZE-20, LZE-40, and LZE-60 nanofibrous membranes. Cu peaks originate from the copper TEM grid.

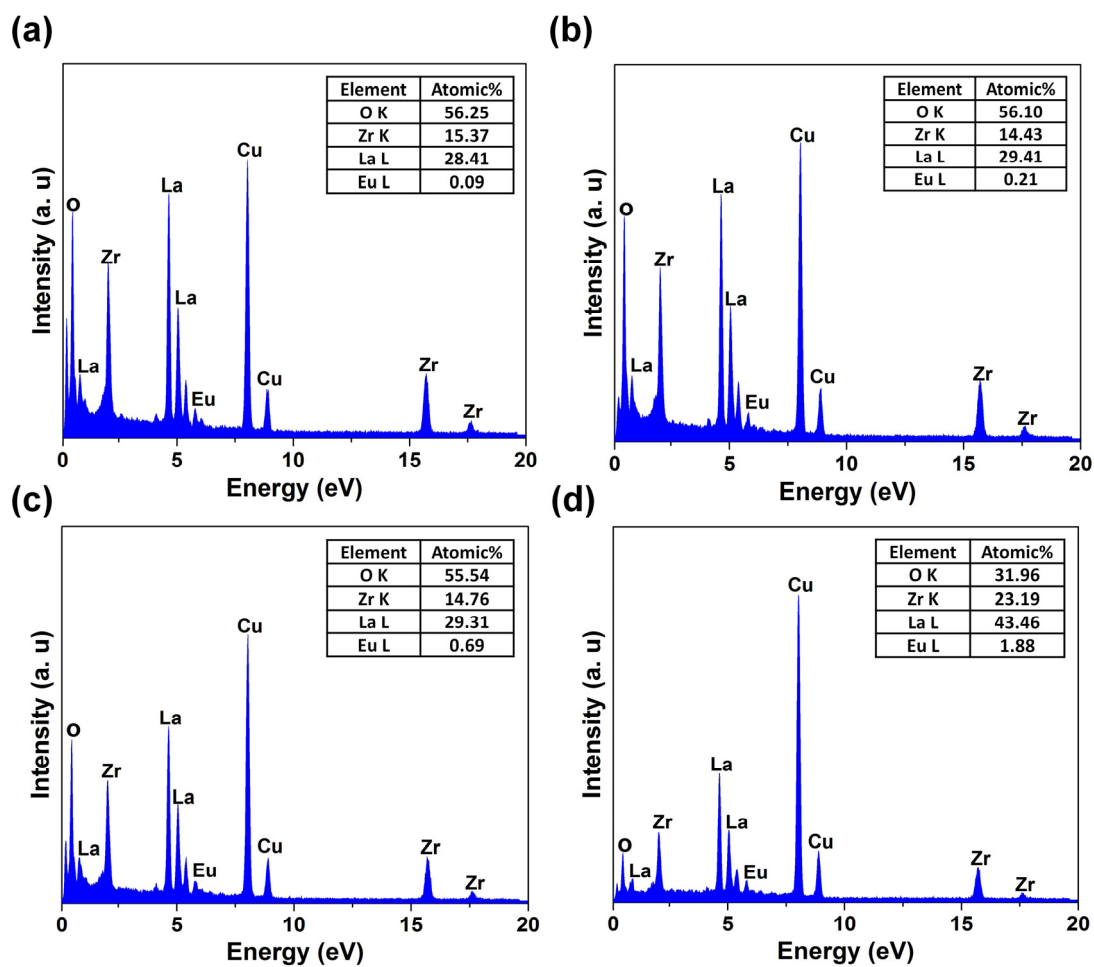

**Fig. S2** EDS spectrums of LZE-0.5, LZE-1, LZE-3, and LZE-5 nanofibrous membranes.

Cu peaks originate from the copper TEM grid.

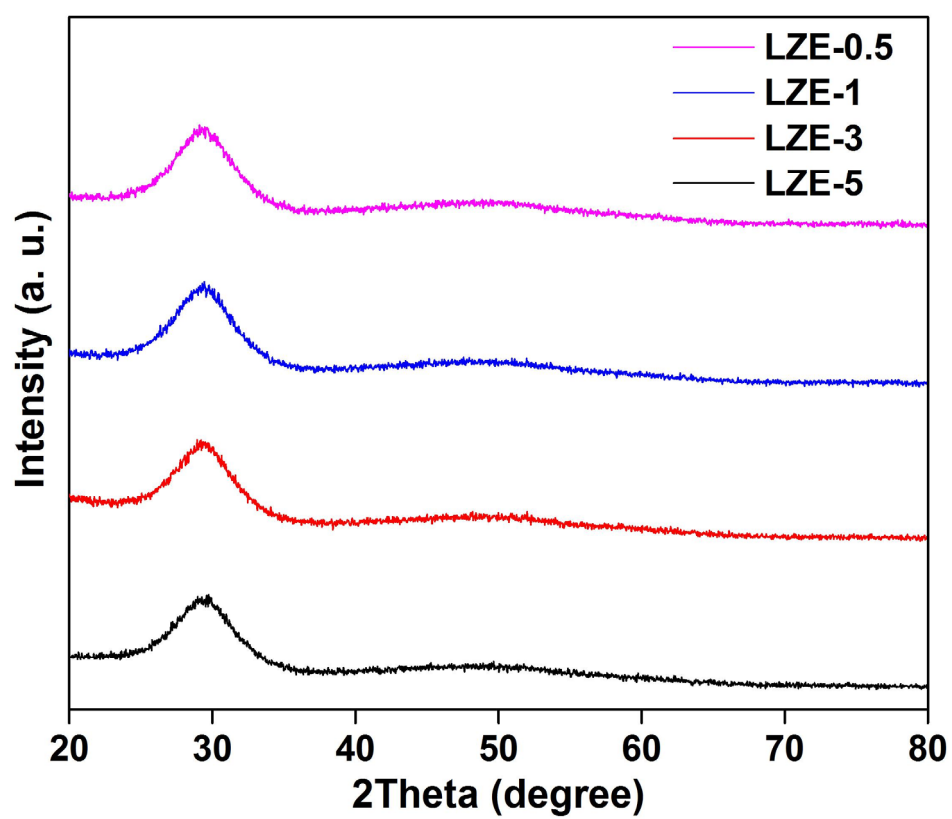

**Fig. S3** XRD patterns of LZE-0.5, LZE-1, LZE-3, and LZE-5 nanofibrous membranes.
